# Supplementary material for: Mutations in SARS-CoV-2 viral RNA identified in Eastern India: Possible implications for the ongoing outbreak in India and impact on viral structure and host susceptibility
Source: Springer Nature journal article supplement (doi:10.1007/s12038-020-00046-1), 2020-06-04
Supplement: MOESM1 [file 12038_2020_46_MOESM1_ESM.docx]

| **GISAID ID** | **Strain ID** |
| --- | --- |
| EPI_ISL_413869 | Guangdong/FS-S42-P0046/2020 |
| EPI_ISL_417064 | HongKong/VB20017970/2020 |
| EPI_ISL_425727 | Scotland/CVR195/2020 |
| EPI_ISL_421613 | USA/NY-PV09061/2020 |
| EPI_ISL_422525 | USA/NY-PV09158/2020 |
| EPI_ISL_421634 | USA/NY-PV09102/2020 |
| EPI_ISL_421428 | USA/NY-PV08492/2020 |
| EPI_ISL_422535 | USA/NY-PV09176/2020 |
| EPI_ISL_422556 | USA/NY-PV09301/2020 |
| EPI_ISL_422562 | USA/NY-PV09309/2020 |
| EPI_ISL_420104 | Singapore/27/2020 |
| EPI_ISL_417534 | Luxembourg/LNS0158952/2020 |
| EPI_ISL_417529 | Luxembourg/LNS5731562/2020 |
| EPI_ISL_421762 | Luxembourg/LNS9510711/2020 |
| EPI_ISL_420608 | France/ARA12499/2020 |
| EPI_ISL_420610 | France/ARA12558/2020 |
| EPI_ISL_419187 | France/ARA12269/2020 |
| EPI_ISL_422592 | Netherlands/NA_283/2020 |
| EPI_ISL_422758 | Netherlands/NA_223/2020 |
| EPI_ISL_422910 | Netherlands/ZuidHolland_38/2020 |
| EPI_ISL_422774 | Netherlands/NA_240/2020 |
| EPI_ISL_422889 | Netherlands/NoordBrabant_95/2020 |
| EPI_ISL_422818 | Netherlands/NA_57/2020 |
| EPI_ISL_423039 | Thailand/Bangkok-CONI-0017/2020 |
| EPI_ISL_418202 | USA/NY-NYUMC17/2020 |
| EPI_ISL_419762 | Australia/VIC48/2020 |
| EPI_ISL_419763 | Australia/VIC43/2020 |
| EPI_ISL_419774 | Australia/VIC62/2020 |
| EPI_ISL_419737 | Australia/VIC18/2020 |
| EPI_ISL_419874 | Australia/VIC177/2020 |
| EPI_ISL_419890 | Australia/VIC194/2020 |
| EPI_ISL_419736 | Australia/VIC17/2020 |
| EPI_ISL_419847 | Australia/VIC150/2020 |
| EPI_ISL_419956 | Australia/VIC263/2020 |
| EPI_ISL_419974 | Australia/VIC283/2020 |
| EPI_ISL_418269 | Vietnam/19-01S/2020 |
| EPI_ISL_425186 | Spain/Valencia62/2020 |
| EPI_ISL_420855 | Australia/VIC-CBA1/2020 |
| EPI_ISL_424346 | USA/AK-PHL037/2020 |
| EPI_ISL_404227 | Zhejiang/WZ-01/2020 |
| EPI_ISL_406798 | Wuhan/WH01/2019 |
| EPI_ISL_417143 | USA/WA-S90/2020 |
| EPI_ISL_417144 | USA/WA-S91/2020 |
| EPI_ISL_417137 | USA/WA-S84/2020 |
| EPI_ISL_417104 | USA/WA-S51/2020 |
| EPI_ISL_417087 | USA/WA-S34/2020 |
| EPI_ISL_425464 | England/NOTT-10DECC/2020 |
| EPI_ISL_413558 | USA/CA-CDPH-UC2/2020 |
| EPI_ISL_413928 | USA/CA-CDPH-UC9/2020 |
| EPI_ISL_420077 | Senegal/618/2020 |
| EPI_ISL_421548 | USA/WY-WYPHL011/2020 |
| EPI_ISL_421200 | Belgium/ULG-10026/2020 |
| EPI_ISL_421188 | Belgium/ULG-10009/2020 |
| EPI_ISL_417030 | Australia/NSW04/2020 |
| EPI_ISL_418349 | Canada/ON_PHL3650/2020 |
| EPI_ISL_418347 | Canada/ON_PHL3741/2020 |
| EPI_ISL_418377 | Canada/ON_PHL1898/2020 |
| EPI_ISL_413014 | Canada/ON-PHL2445/2020 |
| EPI_ISL_424355 | Beijing/Wuhan_IME-BJ01/2020 |
| EPI_ISL_417223 | England/20104004402/2020 |
| EPI_ISL_415134 | England/20100004806/2020 |
| EPI_ISL_414008 | England/200960041/2020 |
| EPI_ISL_424009 | England/20129020004/2020 |
| EPI_ISL_422000 | England/20148003904/2020 |
| EPI_ISL_423585 | England/20148002104/2020 |
| EPI_ISL_424131 | England/20129168902/2020 |
| EPI_ISL_424382 | Iceland/358/2020 |
| EPI_ISL_424521 | Iceland/499/2020 |
| EPI_ISL_424513 | Iceland/491/2020 |
| EPI_ISL_417819 | Iceland/192/2020 |
| EPI_ISL_424449 | Iceland/425/2020 |
| EPI_ISL_424576 | Iceland/556/2020 |
| EPI_ISL_424425 | Iceland/401/2020 |
| EPI_ISL_424615 | Iceland/595/2020 |
| EPI_ISL_417845 | Iceland/4/2020 |
| EPI_ISL_417728 | Iceland/70/2020 |
| EPI_ISL_417706 | Iceland/199/2020 |
| EPI_ISL_417807 | Iceland/16/2020 |
| EPI_ISL_421466 | Portugal/PT0063/2020 |
| EPI_ISL_421493 | Portugal/PT0090/2020 |
| EPI_ISL_421446 | Portugal/PT0043/2020 |
| EPI_ISL_418825 | Canada/BC_4118226/2020 |
| EPI_ISL_418817 | Canada/BC_0554880/2020 |
| EPI_ISL_418850 | Canada/BC_8606204/2020 |
| EPI_ISL_420889 | Japan/Hu_DP_Kng_19-031/2020 |
| EPI_ISL_412968 | Japan/Hu_DP_Kng_19-020/2020 |
| EPI_ISL_414939 | Shandong/LY006/2020 |
| EPI_ISL_414937 | Shandong/LY004/2020 |
| EPI_ISL_420314 | Belgium/NL-030447/2020 |
| EPI_ISL_420424 | Belgium/CCM-0324167/2020 |
| EPI_ISL_420134 | Norway/1495/2020 |
| EPI_ISL_417177 | HongKong/HKPU2_1801/2020 |
| EPI_ISL_420455 | HongKong/HKPU102_2802/2020 |
| EPI_ISL_419227 | HongKong/HKPU57-0702/2020 |
| EPI_ISL_419225 | HongKong/HKPU53-0802/2020 |
| EPI_ISL_419216 | HongKong/HKPU41-0802/2020 |
| EPI_ISL_419241 | HongKong/HKPU65-1202/2020 |
| EPI_ISL_419248 | HongKong/HKPU84-2502/2020 |
| EPI_ISL_426181 | Korea/KCDC2011/2020 |
| EPI_ISL_426045 | USA/NY-Wadsworth-11344-01/2020 |
| EPI_ISL_413521 | Beijing/235/2020 |
| EPI_ISL_421246 | Nanchang/JXN3T4/2020 |
| EPI_ISL_421249 | Xinyu/JX122/2020 |
| EPI_ISL_421247 | Nanchang/JX149/2020 |
| EPI_ISL_421241 | Nanchang/JX177/2020 |
| EPI_ISL_421251 | Shangrao/JX1176/2020 |
| EPI_ISL_421223 | Hangzhou/HZCDC0167/2020 |
| EPI_ISL_421227 | Hangzhou/HZCDC0091L/2020 |
| EPI_ISL_421225 | Hangzhou/HZCDC0135/2020 |
| EPI_ISL_420567 | Italy/TE5780/2020 |
| EPI_ISL_413850 | Guangdong/GDFS2020054-P0005/2020 |
| EPI_ISL_417212 | NewZealand/CoV002/2020 |
| EPI_ISL_422433 | Singapore/40/2020 |
| EPI_ISL_419001 | Singapore/19/2020 |
| EPI_ISL_419700 | USA/NY-NYUMC39/2020 |
| EPI_ISL_420577 | USA/NY-NYUMC62/2020 |
| EPI_ISL_424953 | USA/NY-NYUMC146/2020 |
| EPI_ISL_424965 | USA/NY-NYUMC158/2020 |
| EPI_ISL_421726 | USA/NY-NYUMC114/2020 |
| EPI_ISL_424929 | USA/NY-NYUMC122/2020 |
| EPI_ISL_421707 | USA/NY-NYUMC95/2020 |
| EPI_ISL_421586 | USA/NY-NYUMC85/2020 |
| EPI_ISL_425993 | Scotland/EDB390/2020 |
| EPI_ISL_425894 | Scotland/EDB106/2020 |
| EPI_ISL_425963 | Scotland/EDB283/2020 |
| EPI_ISL_425901 | Scotland/EDB114/2020 |
| EPI_ISL_425983 | Scotland/EDB365/2020 |
| EPI_ISL_425908 | Scotland/EDB128/2020 |
| EPI_ISL_415660 | Chile/Santiago_op3d1/2020 |
| EPI_ISL_425268 | England/CAMB-73A28/2020 |
| EPI_ISL_419832 | Australia/NT02/2020 |
| EPI_ISL_419508 | Wales/PHWC-24D87/2020 |
| EPI_ISL_418096 | Wales/PHWC-23BAC/2020 |
| EPI_ISL_422284 | Wales/PHWC-2565E/2020 |
| EPI_ISL_421005 | Wales/PHWC-25560/2020 |
| EPI_ISL_418124 | Wales/PHWC-23EA3/2020 |
| EPI_ISL_421307 | USA/WI-49/2020 |
| EPI_ISL_425142 | USA/WI-85/2020 |
| EPI_ISL_420907 | Germany/BAV-V2011675/2020 |
| EPI_ISL_414566 | Netherlands/ZuidHolland_24/2020 |
| EPI_ISL_410713 | Singapore/7/2020 |
| EPI_ISL_420849 | DRC/523/2020 |
| EPI_ISL_417442 | DRC/KN-0072/2020 |
| EPI_ISL_420801 | Korea/BA-ACH_2719/2020 |
| EPI_ISL_404895 | USA/WA1/2020 |
| EPI_ISL_403929 | Wuhan/IPBCAMS-WH-04/2019 |
| EPI_ISL_402123 | Wuhan/IPBCAMS-WH-01/2019 |
| EPI_ISL_424236 | USA/WA-UW-1732/2020 |
| EPI_ISL_424208 | USA/WA-UW-1712/2020 |
| EPI_ISL_424221 | USA/WA-UW-1748/2020 |
| EPI_ISL_426065 | USA/ID-UW-4357/2020 |
| EPI_ISL_416695 | USA/WA-UW157/2020 |
| EPI_ISL_424336 | USA/WA-UW-1988/2020 |
| EPI_ISL_422982 | USA/UN-UW-1403/2020 |
| EPI_ISL_418070 | USA/WA-UW285/2020 |
| EPI_ISL_418942 | USA/WA-UW375/2020 |
| EPI_ISL_418038 | USA/WA-UW253/2020 |
| EPI_ISL_416656 | USA/WA-UW118/2020 |
| EPI_ISL_416652 | USA/WA-UW114/2020 |
| EPI_ISL_416717 | USA/WA-UW179/2020 |
| EPI_ISL_417361 | USA/WA-UW212/2020 |
| EPI_ISL_418929 | USA/WA-UW362/2020 |
| EPI_ISL_424166 | USA/WA-UW-1620/2020 |
| EPI_ISL_426096 | USA/WA-UW-2141/2020 |
| EPI_ISL_422999 | USA/WA-UW-1349/2020 |
| EPI_ISL_414364 | USA/WA-UW16/2020 |
| EPI_ISL_419726 | Australia/VIC119/2020 |
| EPI_ISL_419830 | Australia/VIC137/2020 |
| EPI_ISL_408666 | Japan/TY-WK-501/2020 |
| EPI_ISL_407084 | Japan/AI-I-004/2020 |
| EPI_ISL_408479 | Chongqing/ZX01/2020 |
| EPI_ISL_418386 | Finland/13M26/2020 |
| EPI_ISL_418392 | Finland/13M58/2020 |
| EPI_ISL_402120 | Wuhan/IVDC-HB-04/2020 |
| EPI_ISL_424916 | USA/MA_3616/2020 |
| EPI_ISL_424912 | USA/MA_9889/2020 |
| EPI_ISL_424895 | USA/IA_6396/2020 |
| EPI_ISL_408010 | USA/CA5/2020 |
| EPI_ISL_424970 | Taiwan/CGMH-CGU-14/2020 |
| EPI_ISL_424978 | Taiwan/CGMH-CGU-20/2020 |
| EPI_ISL_424972 | Taiwan/CGMH-CGU-16/2020 |
| EPI_ISL_424975 | Taiwan/CGMH-CGU-19/2020 |
| EPI_ISL_408668 | Vietnam/VR03-38142/2020 |
| EPI_ISL_418982 | Belgium/HAA-030953/2020 |
| EPI_ISL_416331 | Shanghai/SH0022/2020 |
| EPI_ISL_416339 | Shanghai/SH0030/2020 |
| EPI_ISL_416387 | Shanghai/SH0088/2020 |
| EPI_ISL_416388 | Shanghai/SH0091/2020 |
| EPI_ISL_416354 | Shanghai/SH0045/2020 |
| EPI_ISL_416396 | Shanghai/SH0106/2020 |
| EPI_ISL_416384 | Shanghai/SH0083/2020 |
| EPI_ISL_415709 | Hangzhou/ZJU-01/2020 |
| EPI_ISL_408489 | Taiwan/NTU01/2020 |
| EPI_ISL_422407 | Taiwan/NTU04/2020 |
| EPI_ISL_417964 | USA/UT-00014/2020 |
| EPI_ISL_420808 | USA/UT-00288/2020 |
| EPI_ISL_418514 | Hangzhou/HZ576/2020 |
| EPI_ISL_418509 | Hangzhou/HZ178/2020 |
| EPI_ISL_402125 | Wuhan-Hu-1/2019 |
| EPI_ISL_404228 | Zhejiang/WZ-02/2020 |
| EPI_ISL_414692 | Guangzhou/GZMU0014/2020 |
| EPI_ISL_420544 | India/2020763/2020 |
| EPI_ISL_431102 | India/GMC-KN318/2020 |
| EPI_ISL_435049 | India/GBRC2/2020 |
| EPI_ISL_435054 | India/GBRC7/2020 |
| EPI_ISL_421281 | USA/IN-Lilly-IPB0170-4bc21/2020 |
| EPI_ISL_421279 | USA/IN-Lilly-IPB0170-4bc20/2020 |
| EPI_ISL_435050 | India/GBRC3/2020 |
| EPI_ISL_426414 | India/GBRC1/2020 |
| EPI_ISL_426415 | India/GBRC1s/2020 |
| EPI_ISL_431117 | India/GMC-TC469/2020 |
| EPI_ISL_435051 | India/GBRC4/2020 |
| EPI_ISL_435052 | India/GBRC5/2020 |
| EPI_ISL_435053 | India/GBRC6/2020 |
| EPI_ISL_435055 | India/GBRC8/2020 |
| EPI_ISL_424866 | USA/IN_2001/2020 |
| EPI_ISL_435062 | India/NCDC-01538/2020 |
| EPI_ISL_431101 | India/GMC-RK100/2020 |
| EPI_ISL_431103 | India/GMC-KN443/2020 |
| EPI_ISL_435056 | India/GBRC9/2020 |
| EPI_ISL_420543 | India/763/2020 |
| EPI_ISL_420545 | India/770/2020 |
| EPI_ISL_420549 | India/773/2020 |
| EPI_ISL_420551 | India/777/2020 |
| EPI_ISL_420555 | India/c32/2020 |
| EPI_ISL_426179 | India/c31/2020 |
| EPI_ISL_424362 | India/1135/2020 |
| EPI_ISL_424364 | India/3118/2020 |
| EPI_ISL_424365 | India/3239/2020 |
| EPI_ISL_420547 | India/772/2020 |
| EPI_ISL_420553 | India/781/2020 |
| EPI_ISL_435061 | India/NCDC-01537/2020 |
| EPI_ISL_435070 | India/NCDC-01710/2020 |
| EPI_ISL_435071 | India/NCDC-02105/2020 |
| EPI_ISL_435063 | India/NCDC-01326/2020 |
| EPI_ISL_435067 | India/NCDC-01712/2020 |
| EPI_ISL_435068 | India/NCDC-01757/2020 |
| EPI_ISL_435066 | India/NCDC-01711/2020 |
| EPI_ISL_435064 | India/NCDC-01705/2020 |
| EPI_ISL_435069 | India/NCDC-01744/2020 |
| EPI_ISL_435065 | India/NCDC-01475/2020 |
| EPI_ISL_435074 | India/NCDC-02250/2020 |
| EPI_ISL_413523 | India/1-31/2020 |
| EPI_ISL_413522 | India/1-27/2020 |
| EPI_ISL_421662 | India/1073/2020 |
| EPI_ISL_421669 | India/1616/2020 |
| EPI_ISL_421671 | India/1621/2020 |
| EPI_ISL_421672 | India/1644/2020 |
| EPI_ISL_424361 | India/1063/2020 |
| EPI_ISL_421664 | India/1100/2020 |
| EPI_ISL_421666 | India/1111/2020 |
| EPI_ISL_424363 | India/1652/2020 |
| EPI_ISL_421663 | India/1093/2020 |
| EPI_ISL_421667 | India/1115/2020 |
| EPI_ISL_421665 | India/1104/2020 |
| EPI_ISL_428479 | India/nimh-0113/2020 |
| EPI_ISL_428481 | India/nimh-0130/2020 |
| EPI_ISL_428482 | India/nimh-0182/2020 |
| EPI_ISL_428483 | India/nimh-0318/2020 |
| EPI_ISL_428484 | India/nimh-0351/2020 |
| EPI_ISL_428487 | India/nimh-1071/2020 |
| EPI_ISL_428486 | India/nimh-0996/2020 |
| EPI_ISL_435060 | India/NCDC-01257/2020 |
| EPI_ISL_421670 | India/1617/2020 |
| EPI_ISL_435075 | India/NCDC-02331/2020 |
| EPI_ISL_435081 | India/NCDC-02248/2020 |
| EPI_ISL_435090 | India/NCDC-02326/2020 |
| EPI_ISL_435091 | India/NCDC-02245/2020 |
| EPI_ISL_435086 | India/NCDC-02315/2020 |
| EPI_ISL_435082 | India/NCDC-02322/2020 |
| EPI_ISL_435083 | India/NCDC-02242/2020 |
| EPI_ISL_435094 | India/NCDC-02327/2020 |
| EPI_ISL_435112 | India/NCDC-02251/2020 |
| EPI_ISL_435096 | India/NCDC-02332/2020 |
| EPI_ISL_435095 | India/NCDC-02328/2020 |
| EPI_ISL_435097 | India/NCDC-02252/2020 |
| EPI_ISL_435100 | India/NCDC-02321/2020 |
| EPI_ISL_435093 | India/NCDC-02312/2020 |
| EPI_ISL_435092 | India/NCDC-02244/2020 |
| EPI_ISL_435088 | India/NCDC-02336/2020 |
| EPI_ISL_435098 | India/NCDC-02240/2020 |
| EPI_ISL_435085 | India/NCDC-02310/2020 |
| EPI_ISL_435099 | India/NCDC-02320/2020 |
| EPI_ISL_435080 | India/NCDC-02334/2020 |
| EPI_ISL_435101 | India/NCDC-01441/2020 |
| EPI_ISL_435102 | India/NCDC-01444/2020 |
| EPI_ISL_435105 | India/NCDC-01616/2020 |
| EPI_ISL_435103 | India/NCDC-01604/2020 |
| EPI_ISL_435104 | India/NCDC-01614/2020 |
| EPI_ISL_435106 | India/NCDC-01760/2020 |
| EPI_ISL_435111 | India/NCDC-02415/2020 |
| EPI_ISL_435078 | India/NCDC-02311/2020 |
| EPI_ISL_435108 | India/NCDC-01457/2020 |
| EPI_ISL_435079 | India/NCDC-02318/2020 |
| EPI_ISL_435084 | India/NCDC-02309/2020 |
| EPI_ISL_426422 | USA/IN_72003/2020 |
| EPI_ISL_426423 | USA/IN_82003/2020 |
| EPI_ISL_426424 | USA/IN_92003/2020 |
| EPI_ISL_435073 | India/NCDC-02157/2020 |
| EPI_ISL_435109 | India/NCDC-01638/2020 |
| EPI_ISL_421668 | India/1125/2020 |
| EPI_ISL_428485 | India/nimh-0834/2020 |
| EPI_ISL_435072 | India/NCDC-02155/2020 |
| EPI_ISL_435087 | India/NCDC-02333/2020 |
| EPI_ISL_428480 | India/nimh-0116/2020 |
| EPI_ISL_435107 | India/NCDC-02370/2020 |
| EPI_ISL_435076 | India/NCDC-02329/2020 |
| EPI_ISL_435077 | India/NCDC-02330/2020 |
| EPI_ISL_435110 | India/NCDC-01501/2020 |
| EPI_ISL_435089 | India/NCDC-02323/2020 |
